# Supplementary material for: Selective killing of circulating tumor cells prevents metastasis and extends survival
Source: PubMed Central journal article supplement (PMC6131899; doi:10.1186/s13045-018-0658-5), 2018-09-10

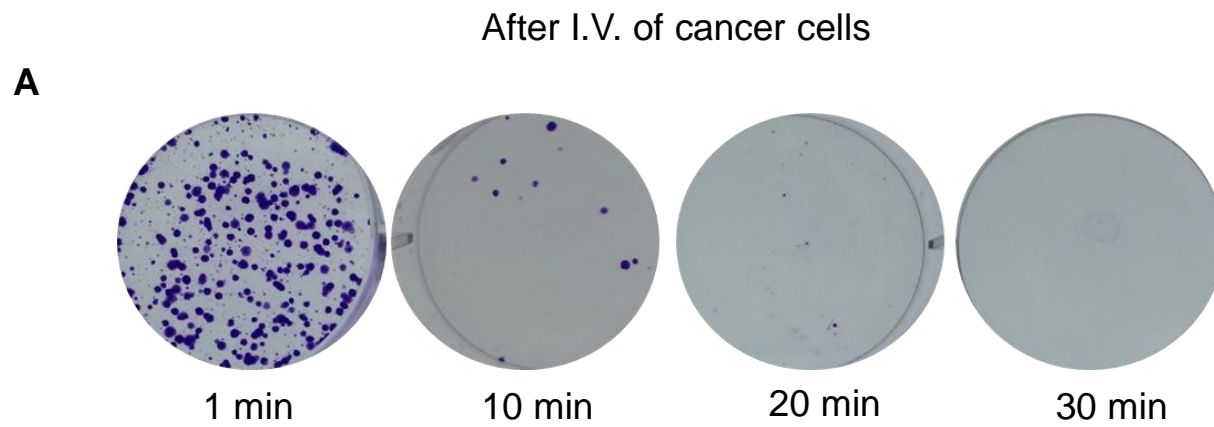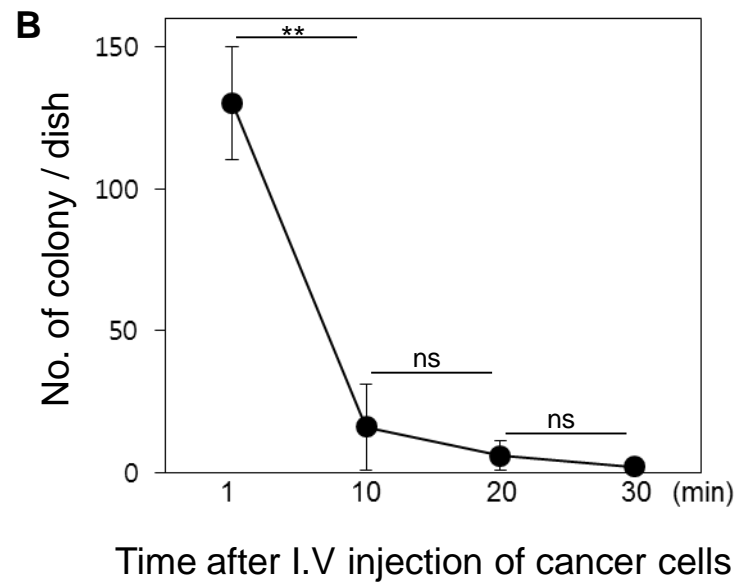

Supplement: 13045_2018_658_MOESM1_ESM.pdf [file 13045_2018_658_MOESM1_ESM.pdf]
